# Supplementary figures and images for: Diagnostic Value of 18 F-NOTA-FAPI PET/CT in A Rat Model of Radiation-induced Lung Damage
Source: Research Square preprint supplement (doi:10.21203/rs.3.rs-1288542/v1), 2022-01-28

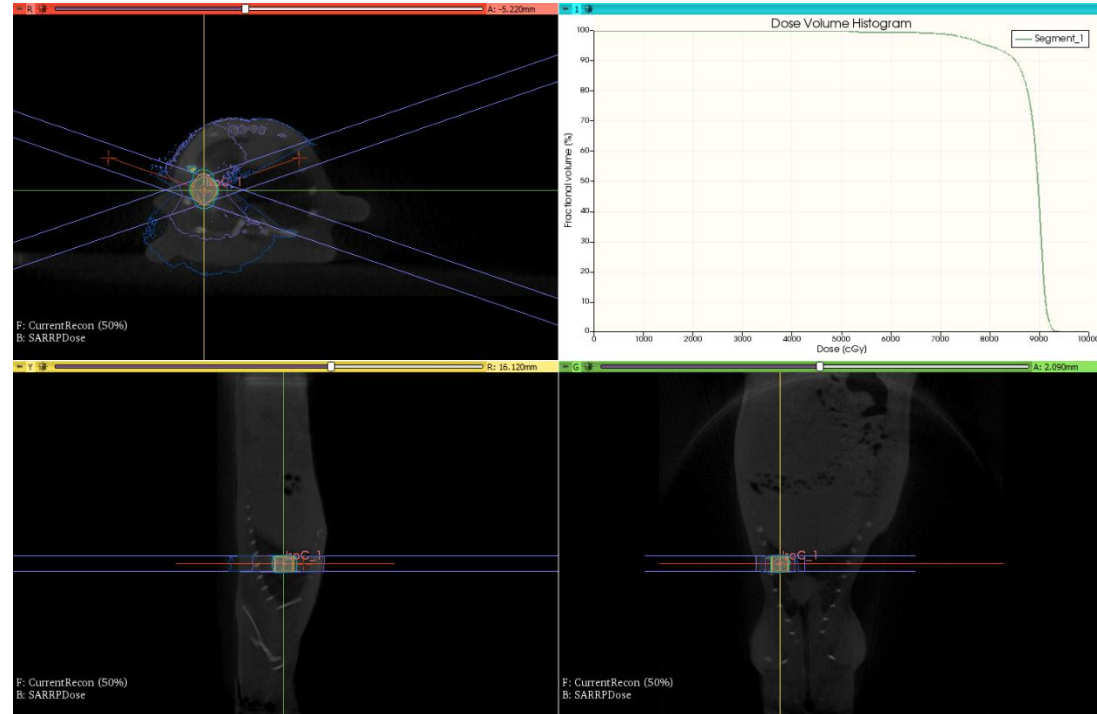

Supplement: Supplementary file 1 [file 45fc33022b25a371f718f06f.pdf]
